# Supplementary material for: Concordance, Correlation, and Clinical Impact of Standardized PD-L1 and TIL Scoring in SCCHN
Source: MDPI journal article supplement (doi:10.3390/cancers14102431), 2022-05-14
Supplement: s1 [file s1]

# Concordance, Correlation, and Clinical Impact of Standardized PD-L1 and TIL Scoring in SCCHN

Stijn Jeroen De Keukeleire <sup>1,2,\*</sup>, Tijl Vermassen <sup>1,3,4</sup>, Philippe Deron <sup>5</sup>, Wouter Huvenne <sup>3,5</sup>, Frédéric Duprez <sup>6</sup>, David Creytens <sup>4,7</sup>, Jo Van Dorpe <sup>7</sup>, Liesbeth Ferdinande <sup>7</sup> and Sylvie Rottey <sup>1,3,4</sup>

<sup>1</sup> Department of Medical Oncology, University Hospital Ghent, 9000 Ghent, Belgium; tijl.vermassen@uzgent.be (T.V.); sylvie.rottey@ugent.be (S.R.)

<sup>2</sup> Department of Internal Medicine, University Hospital Brussels, 1090 Jette, Belgium

<sup>3</sup> Drug Research Unit Ghent, Ghent University Hospital, 9000 Ghent, Belgium

<sup>4</sup> Cancer Research Institute Ghent (CRIG), 9000 Ghent, Belgium

<sup>5</sup> Department of Head and Neck Surgery, Ghent University Hospital, 9000 Ghent, Belgium; philippe.deron@uzgent.be (P.D.); wouter.huvenne@uzgent.be (W.H.)

<sup>6</sup> Department of Radiation Oncology, Ghent University Hospital, 9000 Ghent, Belgium; frederic.duprez@uzgent.be

<sup>7</sup> Department of Pathology, Ghent University Hospital, 9000 Ghent, Belgium; david.creytens@uzgent.be (D.C.); jo.vandorpe@uzgent.be (J.V.D.); liesbeth.ferdinande@ugent.be (L.F.)

\* Correspondence: stijn.dekeukeleire@uzbrussel.be; Tel.: +32-2-477-41-11

**Table S1. Paired analysis for CPS**

| Tissue                          | N  | Median (range)                 | P        |
|---------------------------------|----|--------------------------------|----------|
| Biopsy ↔ resection              | 44 | 2 (0–60) ↔ 5 (0–70)            | 0.0085   |
| Resection ↔ lymph node          | 27 | 5 (0–100) ↔ 8 (0–100)          | 0.0495   |
| Biopsy ↔ lymph node             | 18 | 1 (0–15) ↔ 8 (0–45)            | 0.0076   |
| Primary tumor ↔ metastasis      | 36 | 5 (0–100) ↔ 8 (0–100)          | 0.3669   |
| Biopsy ↔ resection ↔ lymph node | 11 | 1 (0–10) ↔ 5 (1–30) ↔ 5 (0–20) | 0.0017 * |

\* significant difference for biopsy versus resection and for biopsy versus lymph node. CPS, combined positive score.

**Table S2. Correlation for CPS between paired tissue material**

| Correlation                     | n  | r       | P       |
|---------------------------------|----|---------|---------|
| Biopsy versus resection         | 44 | 0.3537  | 0.0185  |
| Resection versus lymph node     | 27 | 0.8592  | <0.0001 |
| Biopsy versus lymph node        | 18 | −0.0281 | 0.9119  |
| Primary tumor versus metastasis | 36 | 0.7512  | <0.0001 |

CPS, combined positive score.

**Table S3. Association for CPS between paired tissue material***A. Biopsy versus resection*

|                  |      | Biopsy  |         |        | <i>P</i> |
|------------------|------|---------|---------|--------|----------|
|                  |      | <1      | 1–19    | ≥20    |          |
| <b>Resection</b> | <1   | 2 (14)  | 5 (19)  | 0 (0)  | 0.1986   |
|                  | 1–19 | 11 (79) | 16 (59) | 1 (33) |          |
|                  | ≥20  | 1 (7)   | 6 (22)  | 2 (67) |          |

*B. Biopsy versus lymph node*

|                   |      | Biopsy |        |       | <i>P</i> |
|-------------------|------|--------|--------|-------|----------|
|                   |      | <1     | 1–19   | ≥20   |          |
| <b>Lymph node</b> | <1   | 3 (38) | 0 (0)  | 0 (0) | 0.1054   |
|                   | 1–19 | 4 (50) | 8 (80) | 0 (0) |          |
|                   | ≥20  | 1 (13) | 2 (20) | 0 (0) |          |

*C. Resection versus lymph node*

|                   |      | Resection |         |        | <i>P</i> |
|-------------------|------|-----------|---------|--------|----------|
|                   |      | <1        | 1–19    | ≥20    |          |
| <b>Lymph node</b> | <1   | 1 (100)   | 3 (18)  | 0 (0)  | 0.0016   |
|                   | 1–19 | 0 (0)     | 13 (77) | 3 (33) |          |
|                   | ≥20  | 0 (0)     | 1 (6)   | 6 (67) |          |

*D. Primary tumor versus metastasis*

|                   |      | Primary tumors |        |         | <i>P</i> |
|-------------------|------|----------------|--------|---------|----------|
|                   |      | <1             | 1–19   | ≥20     |          |
| <b>Metastasis</b> | <1   | 2 (40)         | 0 (0)  | 4 (18)  | 0.0082   |
|                   | 1–19 | 1 (20)         | 6 (67) | 2 (9)   |          |
|                   | ≥20  | 2 (40)         | 3 (33) | 16 (73) |          |

Data denote numbers (% per column). *P* value for bicategorical variables calculated using Fisher Exact test, for tricategorical variables using Chi Square test. CPS, combined positive score.

**Table S4. Association of CPS between primary tumor-based biopsy, primary tumor-based resection and lymph node material**

| Case | Biopsy     |              | Resection  |              | Lymph node |              |
|------|------------|--------------|------------|--------------|------------|--------------|
|      | Continuous | Categorical. | Continuous | Categorical. | Continuous | Categorical. |
| 1    | 0          | <1           | 5          | 1–19         | 0          | <1           |
| 2    | 0          | <1           | 5          | 1–19         | 0          | <1           |
| 3    | 0          | <1           | 1          | 1–19         | 2          | 1–19         |
| 4    | 0          | <1           | 4          | 1–19         | 5          | 1–19         |
| 5    | 0          | <1           | 5          | 1–19         | 8          | 1–19         |
| 6    | 1          | 1–19         | 10         | 1–19         | 8          | 1–19         |
| 7    | 2          | 1–19         | 2          | 1–19         | 5          | 1–19         |
| 8    | 2          | 1–19         | 25         | ≥20          | 8          | 1–19         |
| 9    | 3          | 1–19         | 3          | 1–19         | 2          | 1–19         |
| 10   | 4          | 1–19         | 30         | ≥20          | 20         | ≥20          |
| 11   | 10         | 1–19         | 28         | ≥20          | 15         | 1–19         |

Samples with perfect concordance according to categorical CPS are indicated in green. Perfect concordance was found in 3/11 (27%) cases. CPS, combined positive score.

**Table S5. Paired analysis for TIL<sub>str</sub>**

| Tissue                          | N  | Median (range)                    | P      |
|---------------------------------|----|-----------------------------------|--------|
| Biopsy ↔ resection              | 41 | 15 (1–90) ↔ 20 (0–80)             | 0.2363 |
| Resection ↔ lymph node          | 18 | 20 (1–80) ↔ 20 (0–65)             | 0.8871 |
| Biopsy ↔ lymph node             | 14 | 30 (5–90) ↔ 20 (0–50)             | 0.1167 |
| Primary tumor ↔ metastasis      | 25 | 20 (0–80) ↔ 20 (1–65)             | 0.6263 |
| Biopsy ↔ resection ↔ lymph node | 8  | 30 (5–90) ↔ 20 (5–80) ↔ 18 (0–50) | 0.4630 |

str, stromal; TIL, tumor infiltrating lymphocyte.

**Table S6. Correlation for TIL<sub>str</sub> between paired tissue material**

| Correlation                     | n  | r      | P      |
|---------------------------------|----|--------|--------|
| Biopsy versus resection         | 41 | 0.4807 | 0.0015 |
| Resection versus lymph node     | 18 | 0.1394 | 0.5811 |
| Biopsy versus lymph node        | 14 | 0.0713 | 0.8087 |
| Primary tumor versus metastasis | 25 | 0.1671 | 0.4247 |

str, stromal; TIL, tumor infiltrating lymphocyte.

**Table S7. Association of TIL<sub>str</sub> between primary tumor-based biopsy, primary tumor-based resection and lymph node material**

| Case | Biopsy     |              | Resection  |              | Lymph node |              |
|------|------------|--------------|------------|--------------|------------|--------------|
|      | Continuous | Categorical. | Continuous | Categorical. | Continuous | Categorical. |
| 1    | 15         | <20          | 40         | ≥20          | 20         | ≥20          |
| 2    | 20         | ≥20          | 20         | ≥20          | 10         | <20          |
| 3    | 10         | <20          | 5          | <20          | 4          | <20          |
| 4    | –          | –            | 20         | ≥20          | 65         | ≥20          |
| 5    | 5          | <20          | 20         | ≥20          | 20         | ≥20          |
| 6    | 18         | <20          | 50         | ≥20          | –          | –            |
| 7    | 40         | ≥20          | 20         | ≥20          | 50         | ≥20          |
| 8    | 60         | ≥20          | 50         | ≥20          | 15         | <20          |
| 9    | 20         | ≥20          | –          | –            | 20         | ≥20          |
| 10   | 15         | <20          | 70         | ≥20          | –          | –            |
| 11   | 60         | ≥20          | 8          | <20          | 50         | ≥20          |

Samples with perfect concordance according categorical TIL<sub>str</sub> are indicated in green. Perfect concordance was found in 4/11 (36%) cases. Of note, TILs could not be determined for 4 cases (one biopsy, one resection and two lymph nodes). str, stromal; TIL, tumor infiltrating lymphocyte.

**Table S8. Correlation between pathological parameters and time**

| Samples                                                                        | n  | r       | P value |
|--------------------------------------------------------------------------------|----|---------|---------|
| <b>A. <math>\Delta</math>CPS – <math>\Delta</math>time</b>                     |    |         |         |
| All samples                                                                    | 56 | –0.0784 | 0.5658  |
| Biopt versus resection                                                         | 44 | 0.1820  | 0.2370  |
| Biopt versus lymph node                                                        | 18 | 0.1217  | 0.6305  |
| Resection versus lymph node                                                    | 9  | 0.0687  | 0.8605  |
| <b>B. <math>\Delta</math>CPS – <math>\log(\Delta</math>time)</b>               |    |         |         |
| All samples                                                                    | 56 | –0.0758 | 0.5789  |
| Biopt versus resection                                                         | 44 | 0.1492  | 0.3339  |
| Biopt versus lymph node                                                        | 18 | 0.1778  | 0.4804  |
| Resection versus lymph node                                                    | 9  | –0.0492 | 0.9000  |
| <b>C. <math>\Delta</math>TIL<sub>str</sub> – <math>\Delta</math>time</b>       |    |         |         |
| All samples                                                                    | 53 | –0.1646 | 0.2389  |
| Biopt versus resection                                                         | 41 | 0.1505  | 0.3476  |
| Biopt versus lymph node                                                        | 13 | –0.1479 | 0.6296  |
| Resection versus lymph node                                                    | 8  | –0.0919 | 0.8287  |
| <b>D. <math>\Delta</math>TIL<sub>str</sub> – <math>\log(\Delta</math>time)</b> |    |         |         |
| All samples                                                                    | 53 | –0.1428 | 0.3076  |
| Biopt versus resection                                                         | 41 | 0.1167  | 0.4676  |
| Biopt versus lymph node                                                        | 13 | –0.1463 | 0.6335  |
| Resection versus lymph node                                                    | 8  | –0.0444 | 0.9169  |

$\Delta$ CPS,  $\Delta$ TILs and  $\Delta$ time were calculated as the difference in CPS, in TILs and in time, respectively, between the second and the first specimen type. For ‘all samples’, the specimens with the longest  $\Delta$ time were selected. CPS, combined positive score; str, stromal; TIL, tumor infiltrating lymphocyte.

**Table S9. Correlation between CPS and TIL<sub>str</sub>**

| <b>Correlation</b>                               | <b>n</b> | <b>r</b> | <b>P</b> |
|--------------------------------------------------|----------|----------|----------|
| <i>A. All samples</i>                            |          |          |          |
| CPS versus TIL <sub>str</sub>                    | 146      | 0.2067   | 0.0123   |
| CPS versus log (TIL <sub>str</sub> )             | 144      | 0.2151   | 0.0096   |
| Log (CPS) versus TIL <sub>str</sub>              | 116      | 0.2274   | 0.0141   |
| Log (CPS) versus log (TIL <sub>str</sub> )       | 116      | 0.2692   | 0.0035   |
| <i>B. Biopsy</i>                                 |          |          |          |
| CPS versus TIL <sub>str</sub>                    | 53       | 0.0550   | 0.6959   |
| CPS versus log (TIL <sub>str</sub> )             | 53       | 0.0853   | 0.5438   |
| Log (CPS) versus TIL <sub>str</sub>              | 39       | 0.1799   | 0.2732   |
| Log (CPS) versus log (TIL <sub>str</sub> )       | 39       | 0.1835   | 0.2634   |
| <i>C. Resection</i>                              |          |          |          |
| CPS versus TIL <sub>str</sub>                    | 62       | 0.2680   | 0.0352   |
| CPS versus log (TIL <sub>str</sub> )             | 61       | 0.2331   | 0.0707   |
| Log (CPS) versus TIL <sub>str</sub>              | 53       | 0.2508   | 0.0701   |
| Log (CPS) versus log (TIL <sub>str</sub> )       | 53       | 0.2698   | 0.0507   |
| <i>D. Lymph node</i>                             |          |          |          |
| CPS versus TIL <sub>str</sub>                    | 25       | 0.1584   | 0.4494   |
| CPS versus log (TIL <sub>str</sub> )             | 25       | 0.2338   | 0.2607   |
| Log (CPS) versus TIL <sub>str</sub>              | 21       | 0.2291   | 0.3177   |
| Log (CPS) versus log (TIL <sub>str</sub> )       | 21       | 0.3983   | 0.0737   |
| <i>E. Distant metastasis</i>                     |          |          |          |
| CPS versus TIL <sub>str</sub>                    | 6        | 0.9757   | 0.0009   |
| CPS versus log (TIL <sub>str</sub> )             | 5        | 0.8293   | 0.0825   |
| Log (CPS) versus TIL <sub>str</sub>              | 3        | 0.9737   | 0.1464   |
| Log (CPS) versus log (TIL <sub>str</sub> )       | 3        | 0.9081   | 0.2750   |
| <i>F. Samples selected for survival analysis</i> |          |          |          |
| CPS versus TIL <sub>str</sub>                    | 80       | 0.2332   | 0.0373   |
| CPS versus log (TIL <sub>str</sub> )             | 77       | 0.2134   | 0.0623   |
| Log (CPS) versus TIL <sub>str</sub>              | 68       | 0.2396   | 0.0491   |
| Log (CPS) versus log (TIL <sub>str</sub> )       | 68       | 0.2870   | 0.0177   |

For log (TIL<sub>str</sub>), all cases with TILs = 0% were excluded. For log (CPS), all cases with CPS = 0 were excluded. For log (TIL<sub>str</sub>) and log (CPS), all cases with no TIL<sub>str</sub> = 0% and / or CPS = 0 were excluded. CPS, combined positive score; str, stromal; TIL, tumor infiltrating lymphocyte.

**Table S10. DFS analysis since time of tissue acquirement**

| Parameter                           | Univariate analysis |                  |          |
|-------------------------------------|---------------------|------------------|----------|
|                                     | Median DFS (95% CI) | HR (95% CI)      | <i>P</i> |
| <b>T stage</b>                      |                     |                  |          |
| 1–2                                 | 3.7 (1.5–4.0)       | 1                | 0.2520   |
| 3–4                                 | 1.6 (0.9–4.9)       | 1.42 (0.78–2.59) |          |
| <b>N stage</b>                      |                     |                  |          |
| 0                                   | 2.4 (1.4–4.0)       | 1                | 0.4212   |
| 1+                                  | 3.7 (1.2–4.9)       | 0.78 (0.43–1.42) |          |
| <b>AJCC stage</b>                   |                     |                  |          |
| I–II                                | 2.8 (1.0–3.4)       | 1                | 0.6562   |
| III–IV                              | 2.7 (1.4–4.9)       | 1.15 (0.62–2.12) |          |
| <b>Alcohol abuse (≥30 U / week)</b> |                     |                  |          |
| No                                  | 2.7 (1.0–4.9)       | 1                | 0.5335   |
| Yes                                 | 2.4 (1.3–3.7)       | 1.21 (0.66–2.24) |          |
| <b>Smoking history</b>              |                     |                  |          |
| <20 PY                              | 3.4 (0.8–3.4)       | 1                | 0.4141   |
| ≥20 PY                              | 2.6 (1.3–4.0)       | 1.34 (0.66–2.70) |          |
| <b>TIL<sub>str</sub></b>            |                     |                  |          |
| <20%                                | 1.4 (0.8–2.3)       | 1                | 0.0126   |
| ≥20%                                | 4.0 (2.6–4.9)       | 0.45 (0.24–0.84) |          |
| <b>CPS</b>                          |                     |                  |          |
| <1                                  | 1.5 (0.1–3.4)       | 1                | 0.4070   |
| ≥1                                  | 2.7 (1.5–4.9)       | 0.68 (0.78–1.70) |          |

Parameters that reached significance on univariate analysis, were included in the multivariate analysis. CI, confidence interval; CPS, combined positive score; DFS, disease-free survival; HR, hazard ratio; PY, pack-years; str, stromal; TIL, tumor infiltrating lymphocyte.

**Table S11. OS analysis since time of diagnosis**

| Parameter                           | Univariate analysis |                  |          | Multivariate analysis |          |
|-------------------------------------|---------------------|------------------|----------|-----------------------|----------|
|                                     | Median OS (95% CI)  | HR (95% CI)      | <i>P</i> | HR (95% CI)           | <i>P</i> |
| <b>T stage</b>                      |                     |                  |          |                       |          |
| 1–2                                 | NR                  | 1                |          | 1                     |          |
| 3–4                                 | 3.8 (1.9–5.0)       | 2.12 (1.07–4.18) | 0.0310   | 2.06 (1.05–4.03)      | 0.0351   |
| <b>N stage</b>                      |                     |                  |          |                       |          |
| 0                                   | NR                  | 1                |          |                       |          |
| 1+                                  | 4.4 (2.4–5.0)       | 1.09 (0.55–2.14) | 0.8055   |                       |          |
| <b>AJCC stage</b>                   |                     |                  |          |                       |          |
| I–II                                | NR                  | 1                |          |                       |          |
| III–IV                              | 4.2 (2.6–5.0)       | 1.73 (0.88–3.43) | 0.1148   |                       |          |
| <b>Alcohol abuse (≥30 U / week)</b> |                     |                  |          |                       |          |
| No                                  | 5.0 (3.9–5.0)       | 1                |          |                       |          |
| Yes                                 | 3.8 (2.4–4.4)       | 1.82 (0.92–3.61) | 0.0867   |                       |          |
| <b>Smoking history</b>              |                     |                  |          |                       |          |
| <20 PY                              | NR                  | 1                |          |                       |          |
| ≥20 PY                              | 4.2 (2.6–5.0)       | 2.00 (0.92–4.35) | 0.0815   |                       |          |
| <b>TIL<sub>str</sub></b>            |                     |                  |          |                       |          |
| <20%                                | 2.4 (1.6–4.4)       | 1                |          | 1                     |          |
| ≥20%                                | 5.0 (3.9–5.0)       | 0.41 (0.21–0.80) | 0.0098   | 0.42 (0.21–0.83)      | 0.0123   |
| <b>CPS</b>                          |                     |                  |          |                       |          |
| <1                                  | 1.4 (0.4–1.6)       | 1                |          |                       |          |
| ≥1                                  | 5.0 (3.8–5.0)       | 0.33 (0.11–1.01) | 0.0516   |                       |          |

Parameters that reached significance on univariate analysis, were included in the multivariate analysis. CI, confidence interval; CPS, combined positive score; HR, hazard ratio; OS, overall survival; PY, pack-years; str, stromal; TIL, tumor infiltrating lymphocyte.

**Table S12. OS analysis since time of tissue acquirement**

| Parameter                           | Univariate analysis |                  |          | Multivariate analysis |          |
|-------------------------------------|---------------------|------------------|----------|-----------------------|----------|
|                                     | Median OS (95% CI)  | HR (95% CI)      | <i>P</i> | HR (95% CI)           | <i>P</i> |
| <b>T stage</b>                      |                     |                  |          |                       |          |
| 1–2                                 | NR                  | 1                |          | 1                     |          |
| 3–4                                 | 3.3 (1.5–4.9)       | 2.07 (1.05–4.09) | 0.0363   | 2.17 (1.11–4.27)      | 0.0241   |
| <b>N stage</b>                      |                     |                  |          |                       |          |
| 0                                   | 4.1 (2.6–4.1)       | 1                |          |                       |          |
| 1+                                  | 4.9 (1.8–4.9)       | 1.06 (0.54–2.09) | 0.8589   |                       |          |
| <b>AJCC stage</b>                   |                     |                  |          |                       |          |
| I–II                                | NR                  | 1                |          |                       |          |
| III–IV                              | 3.7 (1.9–4.9)       | 1.63(0.82–3.28)  | 0.1664   |                       |          |
| <b>Alcohol abuse (≥30 U / week)</b> |                     |                  |          |                       |          |
| No                                  | 4.9 (3.7–4.9)       | 1                |          |                       |          |
| Yes                                 | 3.3 (1.8–3.3)       | 1.92 (0.97–3.80) | 0.0603   |                       |          |
| <b>Smoking history</b>              |                     |                  |          |                       |          |
| <20 PY                              | NR                  | 1                |          |                       |          |
| ≥20 PY                              | 3.7 (2.4–4.9)       | 2.02 (0.93–4.42) | 0.0766   |                       |          |
| <b>TIL<sub>str</sub></b>            |                     |                  |          |                       |          |
| <20%                                | 1.7 (1.3–2.4)       | 1                |          | 1                     |          |
| ≥20%                                | 4.9 (3.7–4.9)       | 0.36 (0.20–0.72) | 0.0038   | 0.36 (0.18–0.71)      | 0.0033   |
| <b>CPS</b>                          |                     |                  |          |                       |          |
| <1                                  | 1.4 (0.1–1.5)       | 1                |          | 1                     |          |
| ≥1                                  | 4.9 (3.6–4.9)       | 0.31 (0.10–0.95) | 0.0406   | 0.49 (0.21–1.15)      | 0.1000   |

Parameters that reached significance on univariate analysis, were included in the multivariate analysis. CI, confidence interval; CPS, combined positive score; HR, hazard ratio; OS, overall survival; PY, pack-years; str, stromal; TIL, tumor infiltrating lymphocyte.



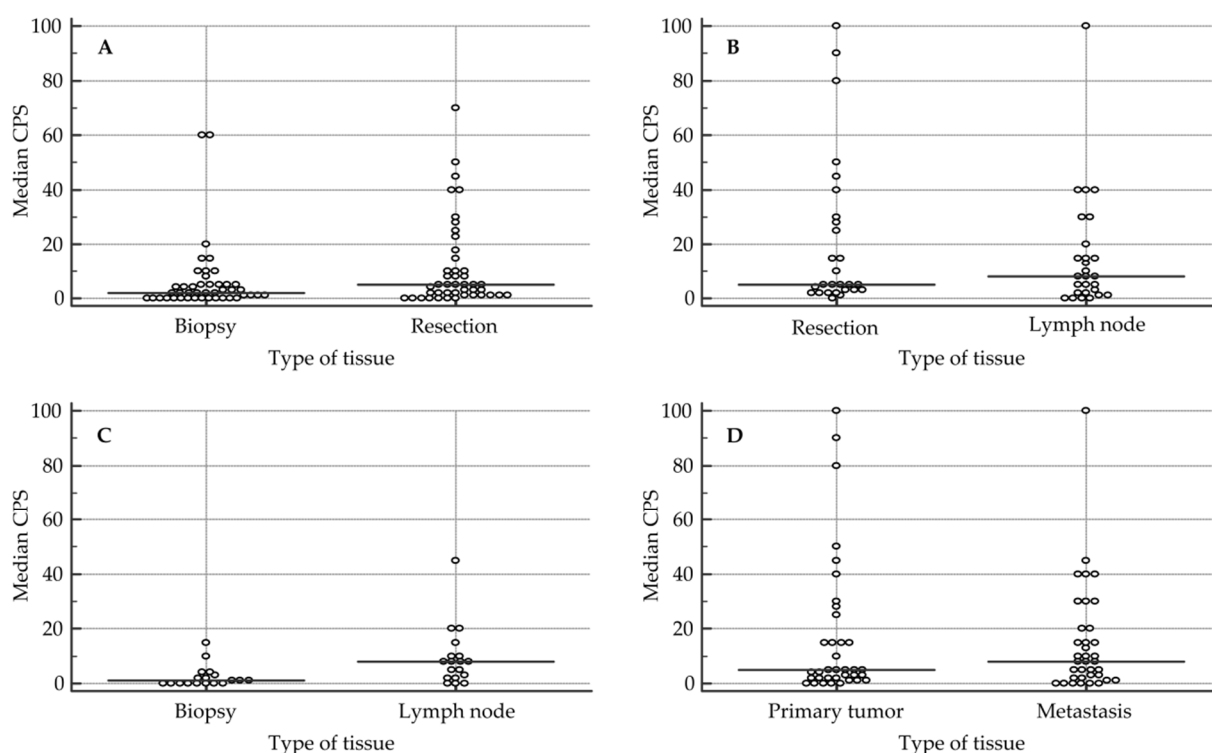

**Figure S1.** Comparison for CPS between paired tissue specimens. Median CPS is indicated in the Y-axis, type of tissue in the X-axis. Comparisons are illustrated for (A) biopsy versus resection material ( $P = 0.0085$ ), (B) resection versus lymph node material ( $P = 0.0495$ ), (C) biopsy versus lymph node material ( $P = 0.0076$ ), and (D) primary tumor versus metastatic material ( $P = 0.3669$ ). CPS, combined positive score.

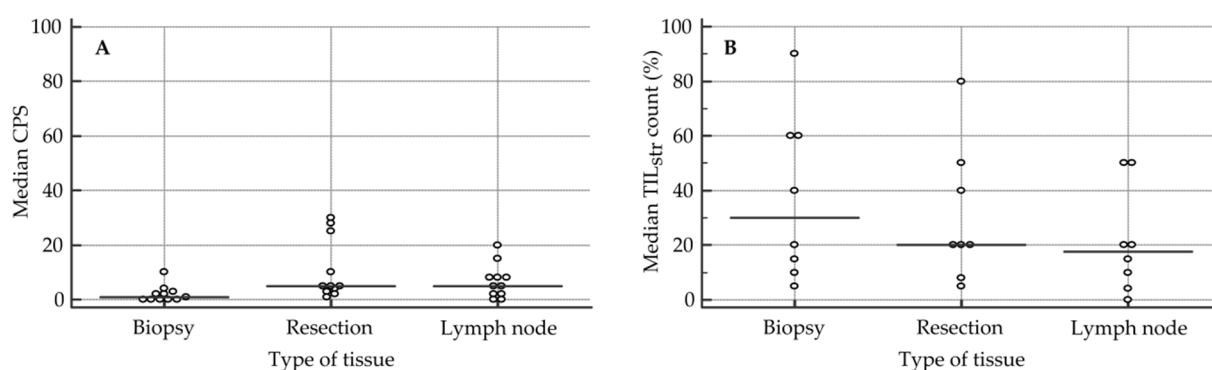

**Figure S2.** Comparison for CPS and TIL<sub>str</sub> between patients for who biopsy, resection and lymph node material is present. Median CPS or TIL<sub>str</sub> count is indicated in the Y-axis, type of tissue in the X-axis. Comparisons are illustrated for (A) median CPS ( $P = 0.0017$ ), (B) TIL<sub>str</sub> count ( $P = 0.4630$ ). CPS, combined positive score; str, stromal, TIL, tumor infiltrating lymphocyte.

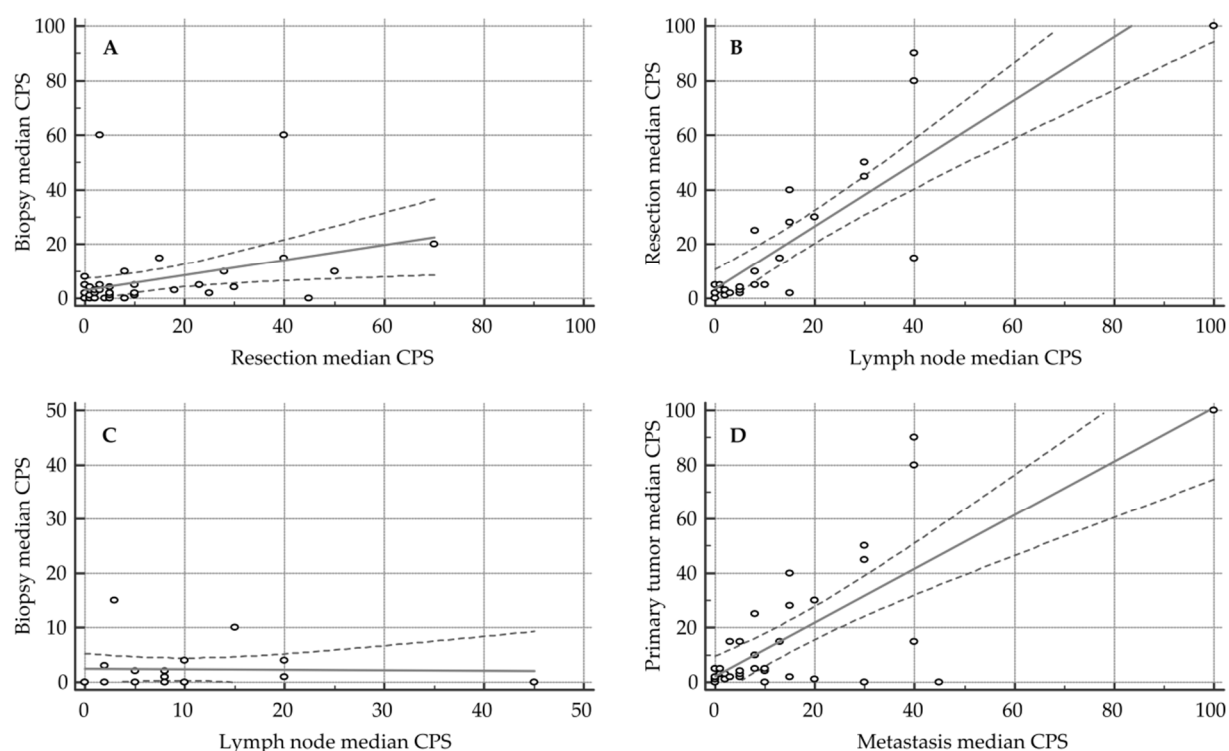

**Figure S3.** Correlation for CPS between paired tissue specimens. Correlations are illustrated for (A) biopsy versus resection material ( $r = 0.3537$ ;  $P = 0.0185$ ), (B) resection versus lymph node material ( $r = 0.8592$ ;  $P < 0.0001$ ), (C) biopsy versus lymph node material ( $r = -0.0281$ ;  $P = 0.9119$ ), and (D) primary tumor versus metastatic material ( $r = 0.7512$ ;  $P < 0.0001$ ). CPS, combined positive score.

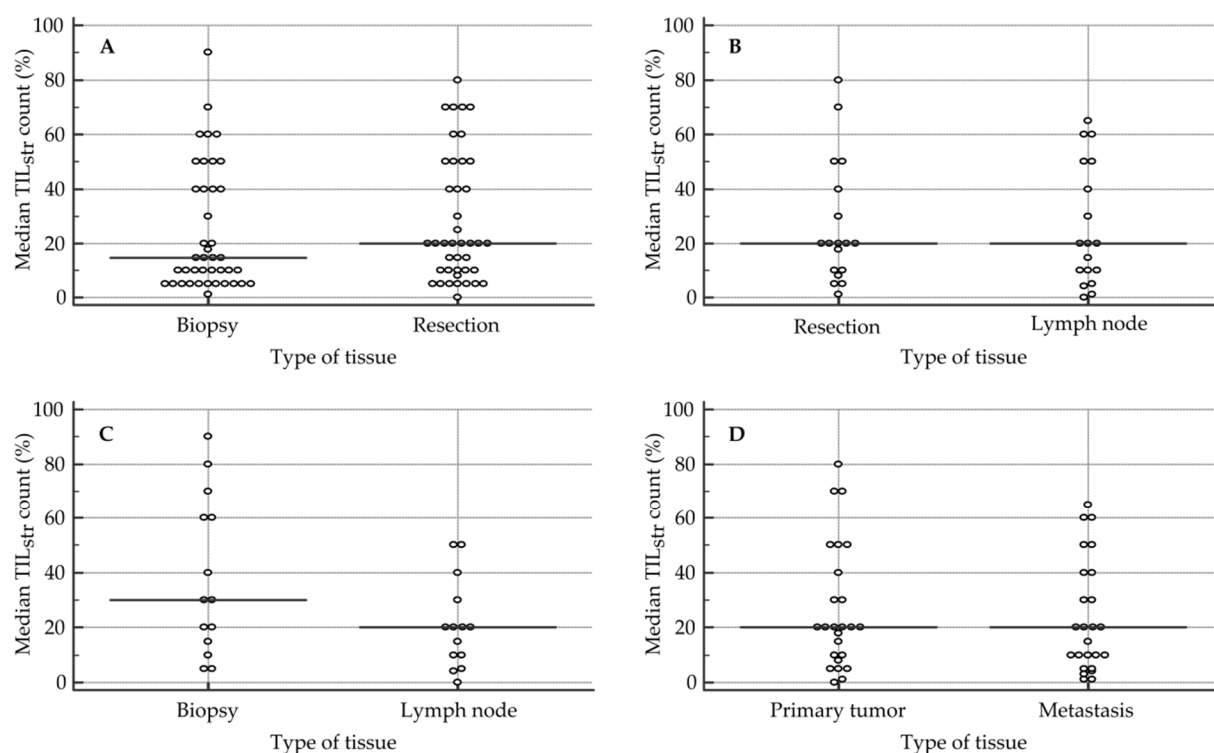

**Figure S4.** Comparison for TIL<sub>str</sub> count between paired tissue specimens. Median TIL<sub>str</sub> count is indicated in the Y-axis, type of tissue in the X-axis. Comparisons are illustrated for (A) biopsy versus resection material ( $P = 0.2363$ ), (B) resection versus lymph node material ( $P = 0.8871$ ), (C) biopsy versus lymph node material ( $P = 0.1167$ ), and (D) primary tumor versus metastatic material ( $P = 0.6263$ ). str, stromal, TIL, tumor infiltrating lymphocyte.

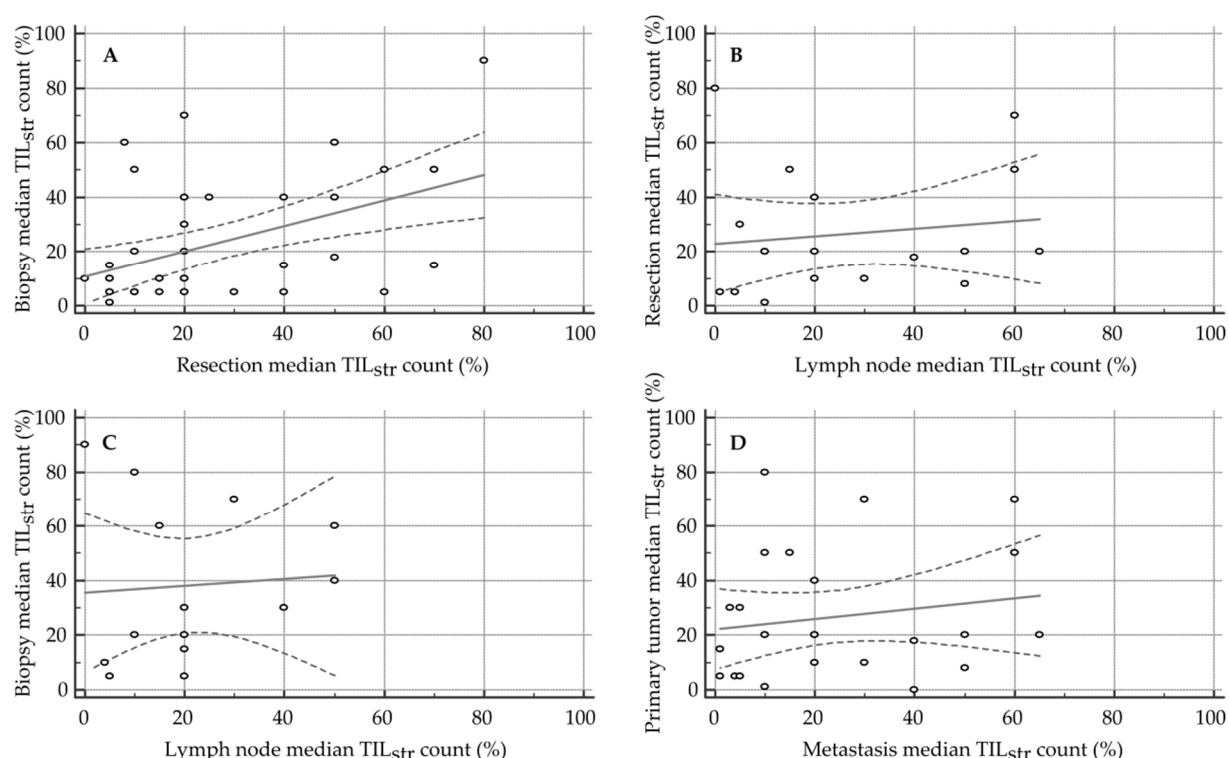

**Figure S5.** Correlation for TIL<sub>str</sub> between paired tissue specimens. Correlations are illustrated for (A) biopsy versus resection material ( $r = 0.4807$ ;  $P = 0.0015$ ), (B) resection versus lymph node material ( $r = 0.1394$ ;  $P = 0.5811$ ), (C) biopsy versus lymph node material ( $r = 0.0713$ ;  $P = 0.8087$ ), and (D) primary tumor versus metastatic material ( $r = 0.1671$ ;  $P = 0.4247$ ). str, stromal; TIL, tumor infiltrating lymphocyte.

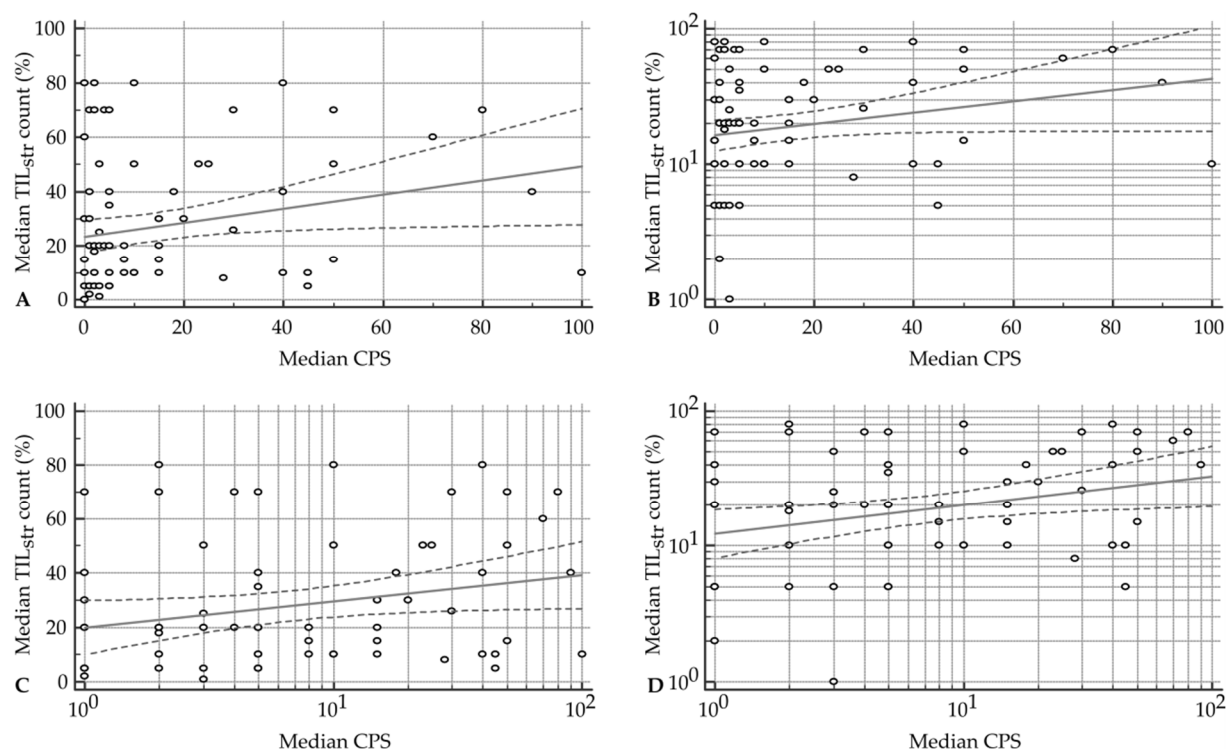

**Figure S6.** Correlation between CPS and TIL<sub>str</sub>, irrespective of tissue origin. Correlations are illustrated for (A) CPS versus TIL<sub>str</sub> ( $r = 0.4807$ ;  $P = 0.0015$ ), (B) CPS versus log (TIL<sub>str</sub>) ( $r = 0.1394$ ;  $P = 0.5811$ ), (C) log (CPS) versus TIL<sub>str</sub> ( $r = 0.0713$ ;  $P = 0.8087$ ), and (D) log (CPS) versus log (TIL<sub>str</sub>) ( $r = 0.1671$ ;  $P = 0.4247$ ). CPS, combined positive score; str, stromal; TIL, tumor infiltrating lymphocyte.

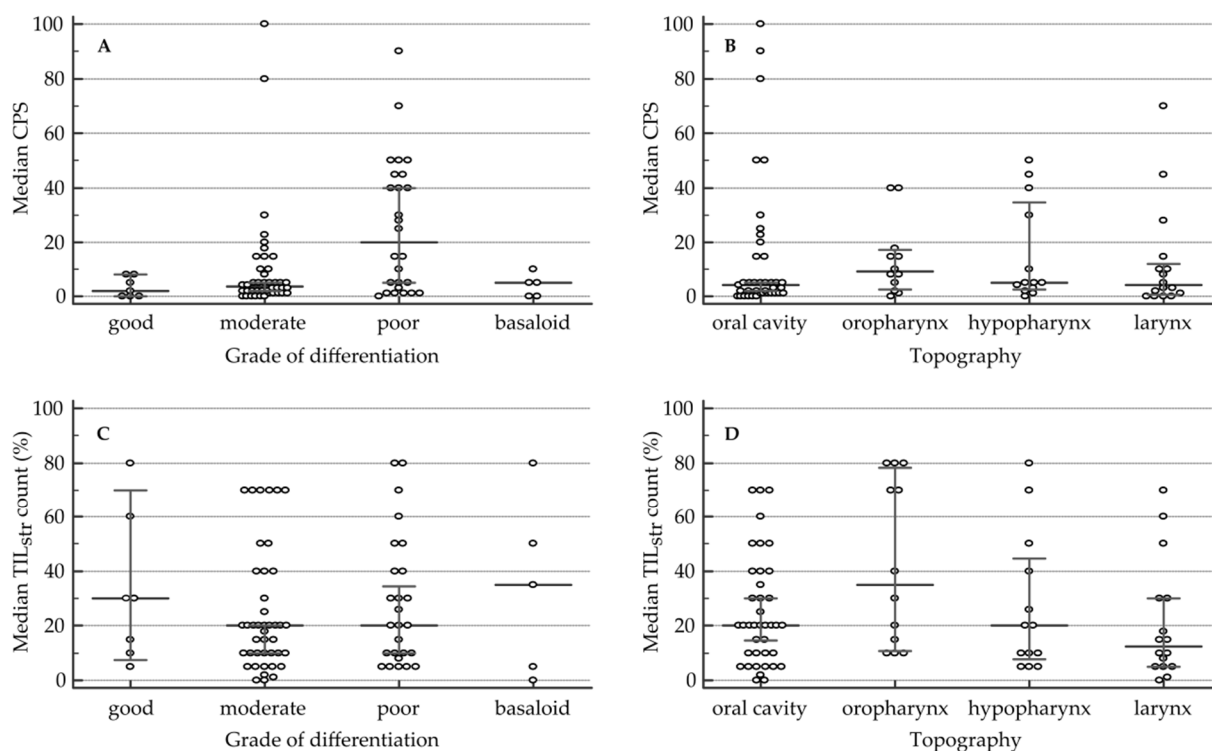

**Figure S7.** Comparison for CPS and TIL<sub>str</sub> count according to tumor differentiation and topography. Median CPS / TIL<sub>str</sub> count is indicated in the Y-axis, tumor differentiation / topography in the X-axis. Comparison are illustrated for (A) CPS according to tumor differentiation ( $P = 0.0101$ ), (B) CPS according to topography ( $P = 0.5130$ ), (C) TIL<sub>str</sub> count according to tumor differentiation ( $P = 0.8128$ ), and (D) TIL<sub>str</sub> count according to topography ( $P = 0.1234$ ). CPS, combined positive score; str, stromal, TIL, tumor infiltrating lymphocyte.

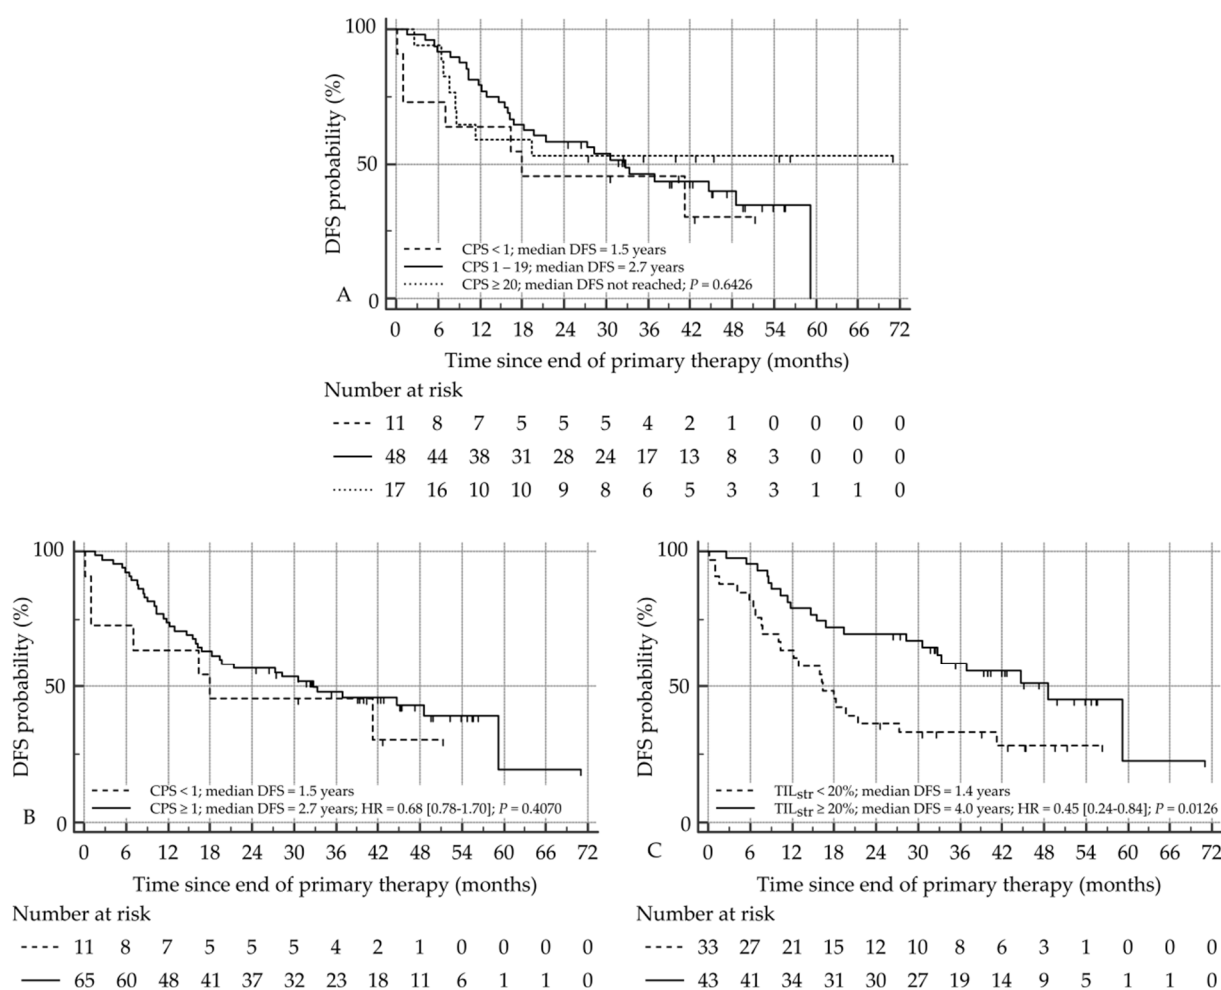

**Figure S8.** Effect of CPS and TIL<sub>str</sub> count on DFS in SCCHN patients. X-axis depicts survival time (in months), Y-axis depicts the cumulative DFS probability. DFS has been depicted for (A) trichotomous CPS, (B) dichotomous CPS, and (C) TIL<sub>str</sub>. Number at risk for each group has been indicated beneath each DFS curve. CPS, combined positive score; DFS, disease-free survival; HR, hazard ratio; SCCHN, squamous cell carcinoma of the head and neck; str, stromal; TIL, tumor infiltrating lymphocyte.

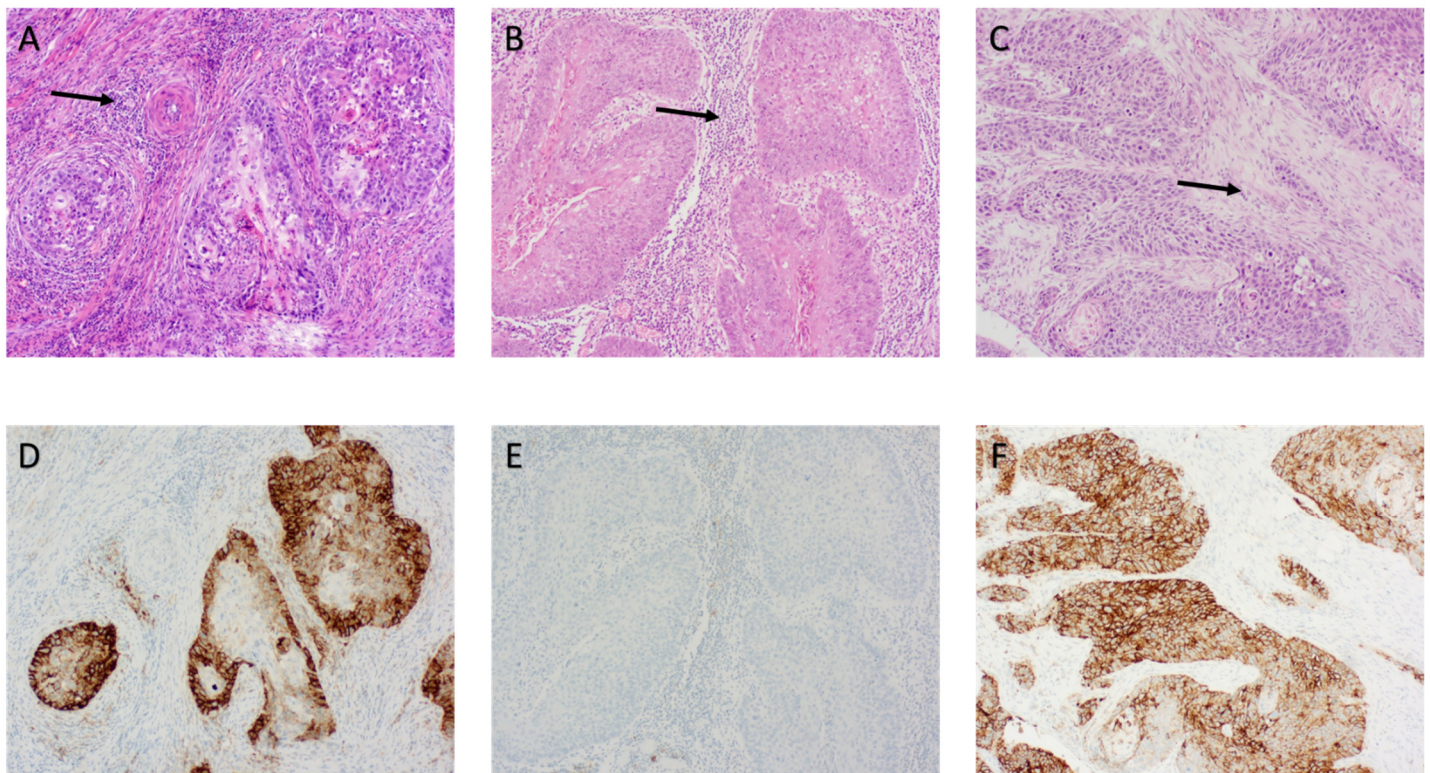

**Figure S9.** Histological sections of SCCHN depicting the heterogeneous profiles of PD-L1 staining and immune infiltration. The upper and lower row indicate paired HE and PD-L1 IHC slides, respectively. Profiles are shown for (1) high TIL<sub>str</sub> (A) and high PD-L1 (D), (2) high TIL<sub>str</sub> (B) and low PD-L1 (E), (3) low TIL<sub>str</sub> (C) and high PD-L1 (F). Arrows: compartment with tumoral stroma. HE, haematoxylin-eosin; IHC, immunohistochemistry; PD-L1, programmed cell death-ligand 1; SCCHN, squamous cell cancer in head and neck; str, stromal; TIL, tumor infiltrating lymphocyte.
